# Supplementary material for: Unlocking the potential of allogeneic Vδ2 T cells for ovarian cancer therapy through CD16 biomarker selection and CAR/IL-15 engineering
Source: Springer Nature journal article supplement (doi:10.1038/s41467-023-42619-2), 2023-11-08
Supplement: MOESM1 [file 41467_2023_42619_MOESM1_ESM.pdf]

**Supplementary Information for**  
**Unlocking the potential of allogeneic V $\delta$ 2 T cells for ovarian cancer therapy through CD16**  
**biomarker selection and CAR/IL-15 engineering**

**Authors**

Derek Lee<sup>1,†</sup>, Zachary Spencer Dunn<sup>1,2,†</sup>, Wenbin Guo<sup>3,†</sup>, Carl J. Rosenthal<sup>1</sup>, Natalie E. Penn<sup>1</sup>, Yanqi Yu<sup>1</sup>, Kuangyi Zhou<sup>1</sup>, Zhe Li<sup>1</sup>, Feiyang Ma<sup>4</sup>, Miao Li<sup>1</sup>, Tsun-Ching Song<sup>1</sup>, Xinjian Cen<sup>1</sup>, Yan-Ruide Li<sup>1</sup>, Jin J. Zhou<sup>5</sup>, Matteo Pellegrini<sup>3,4,6</sup>, Pin Wang<sup>2</sup>, and Lili Yang<sup>1,6,7,8\*</sup>

**Affiliations**

<sup>1</sup> Department of Microbiology, Immunology & Molecular Genetics, University of California, Los Angeles, CA, USA.

<sup>2</sup> Mork Family Department of Chemical Engineering and Materials Science, University of Southern California, Los Angeles, CA, USA.

<sup>3</sup> Bioinformatics Interdepartmental Program, University of California, Los Angeles, CA, USA.

<sup>4</sup> Department of Molecular, Cell, and Developmental Biology, University of California, Los Angeles, CA, USA.

<sup>5</sup> Department of Biostatistics, Fielding School of Public Health, University of California, Los Angeles, CA, USA.

<sup>6</sup> Eli and Edythe Broad Center of Regenerative Medicine and Stem Cell Research, University of California, Los Angeles, CA, USA.

<sup>7</sup> Jonsson Comprehensive Cancer Center, David Geffen School of Medicine, University of California, Los Angeles, CA, USA.

<sup>8</sup> Molecular Biology Institute, University of California, Los Angeles, CA, USA.

<sup>†</sup> These authors contributed equally: Derek Lee, Zachary Spencer Dunn, Wenbin Guo

\*Correspondence: [liliyang@ucla.edu](mailto:liliyang@ucla.edu); Tel.: (+1-310-825-8609)

The SI includes Supplementary Figures 1-5.

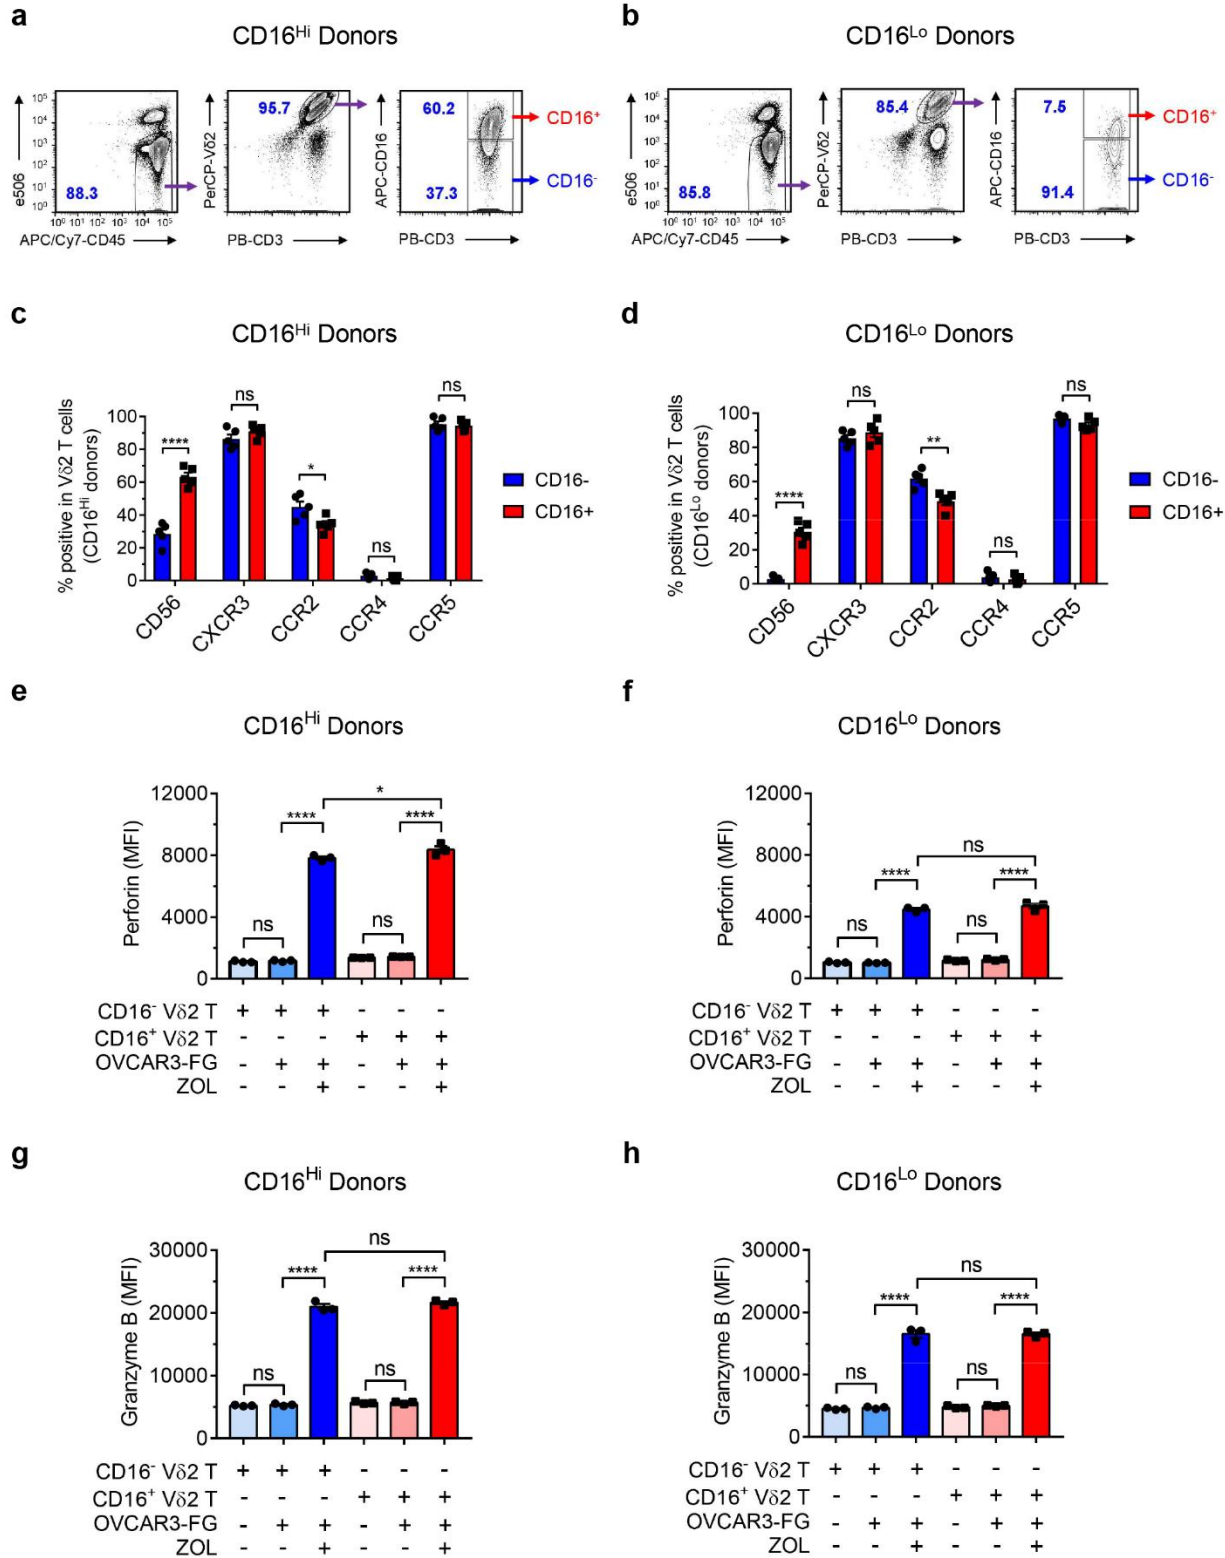

**Supplementary Fig. 1 Characterization of the CD16<sup>+/−</sup> Vδ2 T cells generated from the CD16<sup>Hi</sup> or CD16<sup>Lo</sup> PBMC donors.** Vδ2 T cells were generated from the CD16<sup>Hi</sup> or CD16<sup>Lo</sup> donor PBMCs following the experimental design shown in Fig. 1a, then were subject to FACS analysis for **a, b** the gating strategy to select CD16<sup>+</sup> and CD16<sup>−</sup> Vδ2 T cells from CD16<sup>Hi</sup> or CD16<sup>Lo</sup> donors, **c, d** surface expression markers (n = 5), and **e-h** intracellular perforin and granzyme B production at 24 h after tumor co-culture (E:T ratio = 1:1; n = 3 from 3 different donors). CD16<sup>+</sup> and CD16<sup>−</sup> Vδ2 T cells were gated based on cell surface CD16 expression. Representative of >10 (**a, b**), 2 (**c, d**), and 3 (**e-h**) experiments. Data are presented as the mean ± SEM. ns, not significant; \*p < 0.05; \*\*p < 0.01; \*\*\*\*p < 0.0001 by Student's *t* test (**c, d**) or by one-way ANOVA (**e-h**). Source data and exact p values are provided as a Source Data file.

**a**

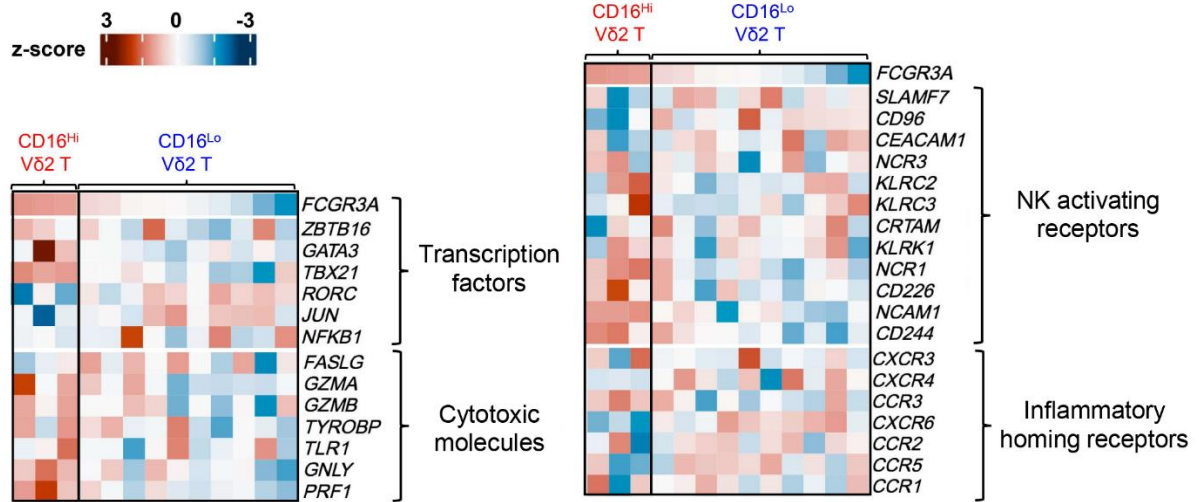

**b**

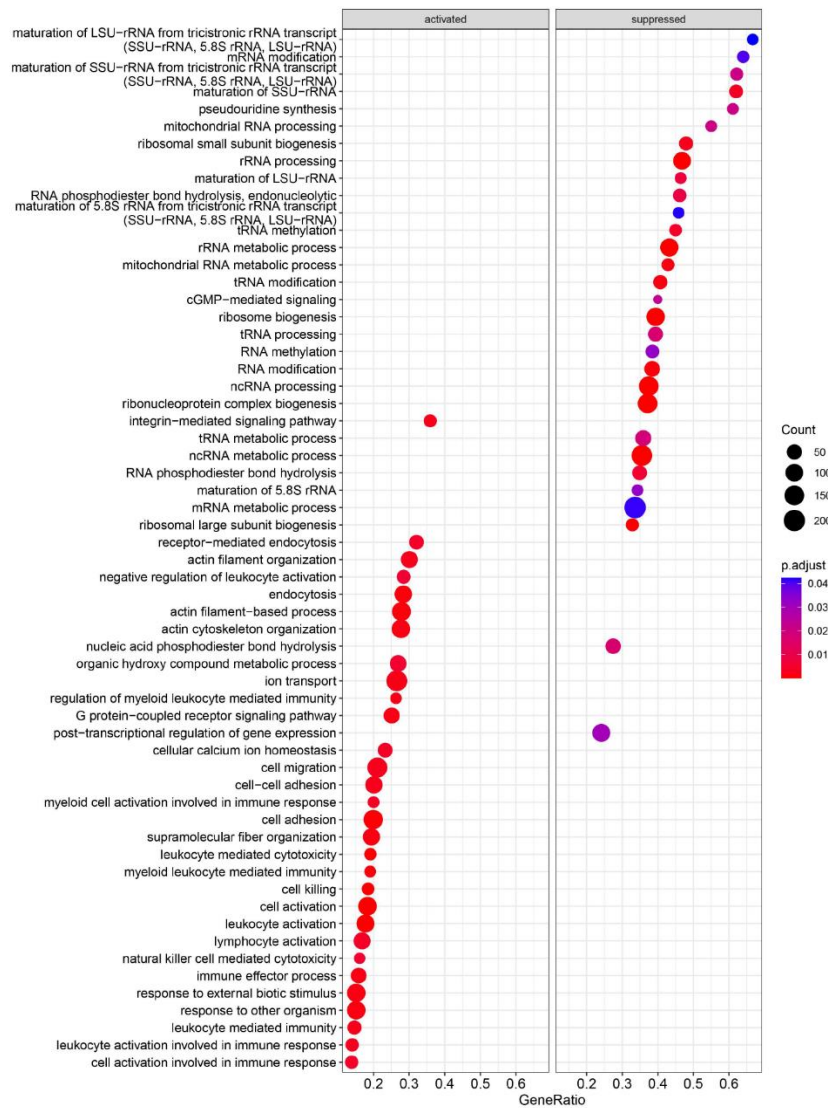

**Supplementary Fig. 2 Transcriptome characterization of Vδ2 T cells in relation to CD16 expression.** **a** Heatmaps showing the expression levels of the selected genes in Vδ2 T cells generated from three CD16<sup>Hi</sup> PBMC donors and ten CD16<sup>Lo</sup> PBMC donors. **b** Gene set enrichment analysis showing the relationship between CD16 expression and biological process pathways in Vδ2 T cells generated from all 13 PBMC donors (including the three CD16<sup>Hi</sup> donors and ten CD16<sup>Lo</sup> donors). The top 30 most significantly activated or suppressed biological process pathways are shown. Representative of 1 experiment.

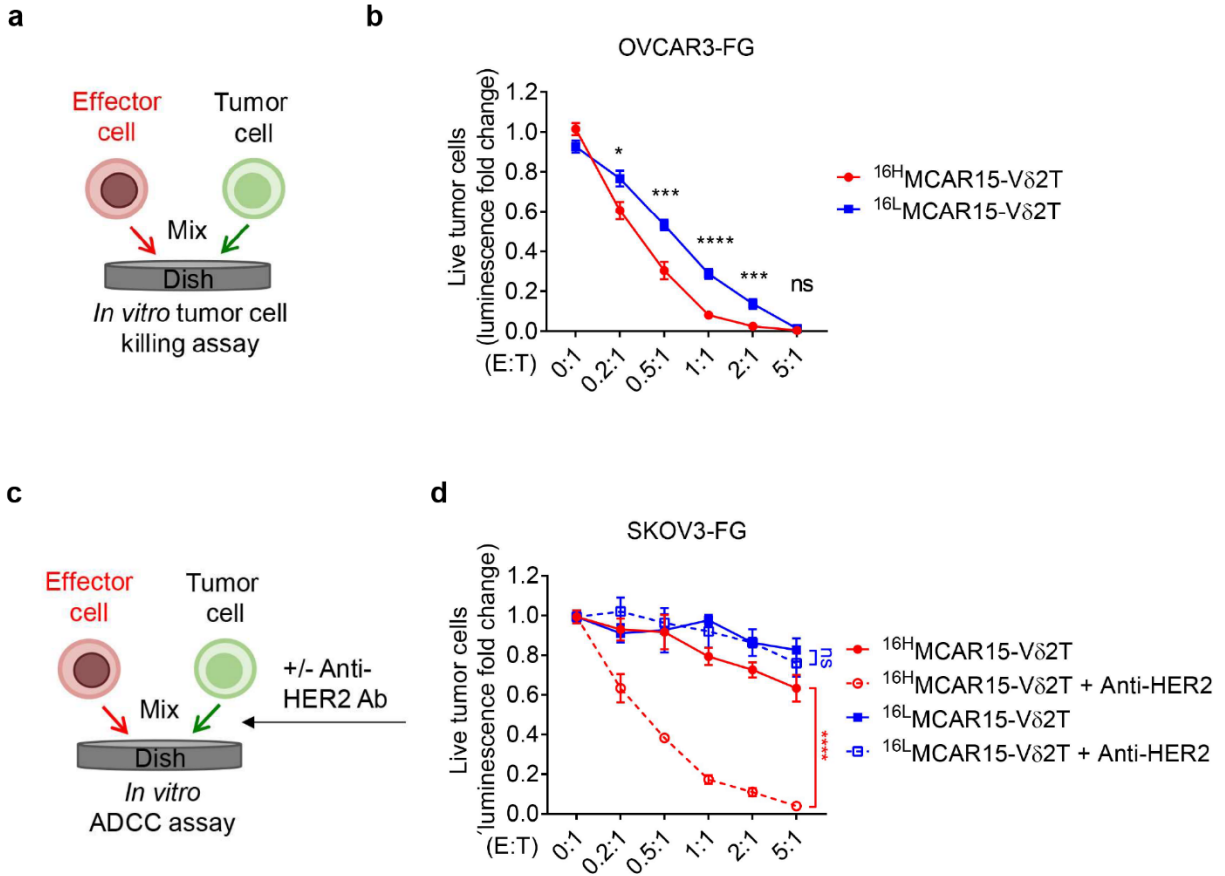

**Supplementary Fig. 3 Comparing the *in vitro* antitumor efficacy of CD16<sup>Hi</sup> and CD16<sup>Lo</sup> MCAR15-Vδ2T cells.** Vδ2 T cells were cultured from the CD16<sup>Hi</sup> or CD16<sup>Lo</sup> donor PBMCs and were engineered to express MCAR and IL-15. The resulting cell products are denoted as 16<sup>H</sup>MCAR15-Vδ2T or 16<sup>L</sup>MCAR15-Vδ2T cells, respectively. **a, b** *In vitro* tumor cell killing assay. An OVCAR3-FG human ovarian cancer cell line was used. **a** Experimental design. **b** Tumor cell killing data collected as 24 h after co-culture (n = 3; n indicates different donors). **c, d** *In vitro* antibody-dependent cell-mediated cytotoxicity (ADCC) assay. A SKOV3-FG human ovarian cancer cell line was used. **c** Experimental design. **d** Tumor cell killing data collected at 24 h after co-culture (Anti-HER2 Ab concentration = 0.1 μg/mL; n = 3; n indicates different donors). Representative of 3 experiments. Data are presented as the mean ± SEM. ns, not significant; \*p < 0.05; \*\*\*p < 0.001; \*\*\*\*p < 0.0001 by Student's *t* test (**b, d**). Source data and exact p values are provided as a Source Data file.

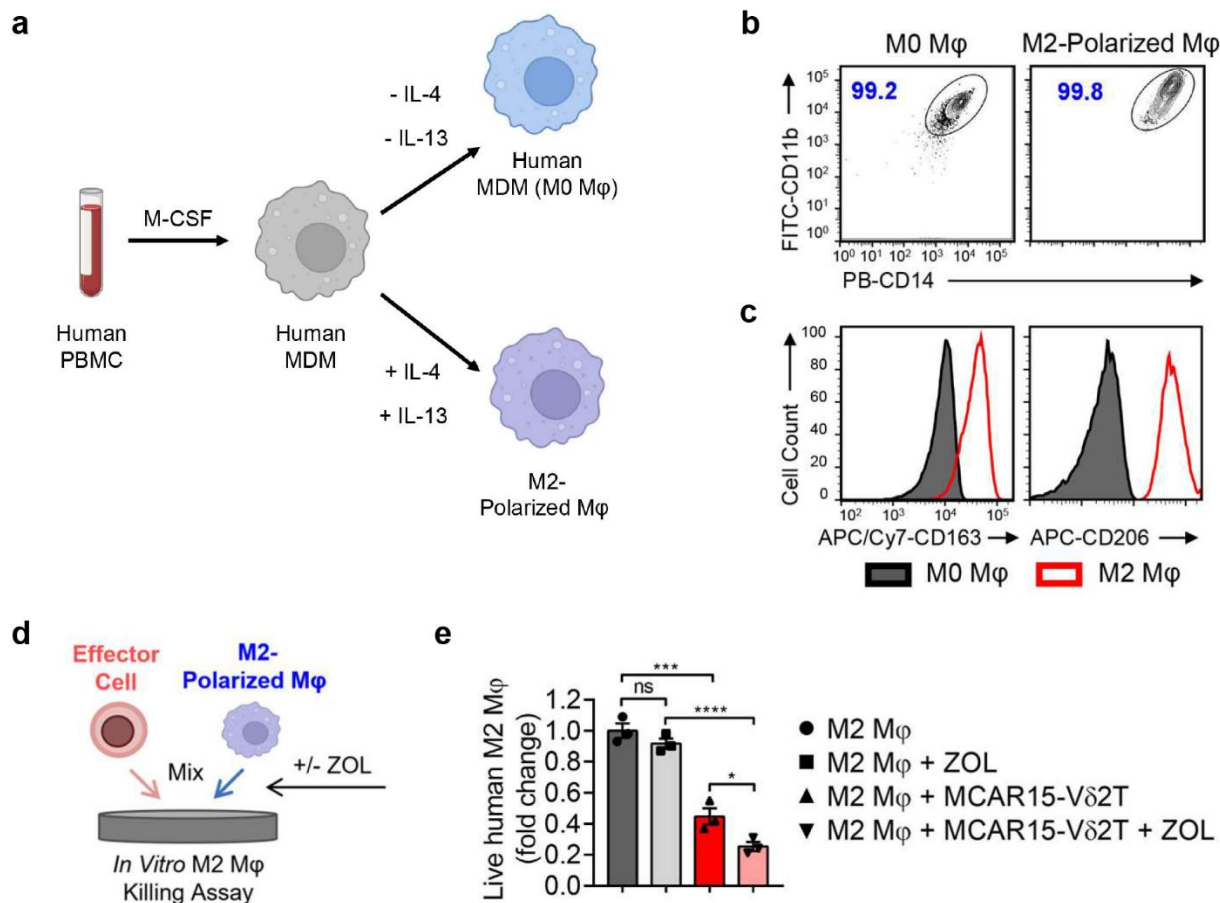

**Supplementary Fig. 4 MCAR15-Vδ2T cells can target M2-polarized human macrophages.** **a** Experimental design to generate human monocyte-derived macrophages (MDM), either non-polarized (M0) or M2-polarized. M-CSF, macrophage colony-stimulating factor; Mφ, macrophage. **b** FACS detection of CD11b and CD14 expression on M2-polarized macrophages. **c** FACS detection of M2 macrophage markers (i.e., CD163 and CD206) on M2-polarized macrophages. **d, e** Studying the *in vitro* killing of M2-polarized macrophages by MCAR15-Vδ2T effector cells. **d** Experimental design. **e** Data collected at 24 h after co-culture (E:Mφ ratio = 1:1, n = 3). Data are presented as the mean ± SEM. ns, not significant; \*p < 0.05; \*\*\*p < 0.001; \*\*\*\*p < 0.0001 by one-way ANOVA (**e**). Source data and exact p values are provided as a Source Data file.

**a**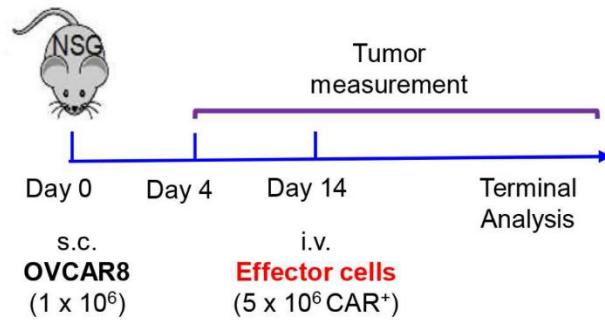**b**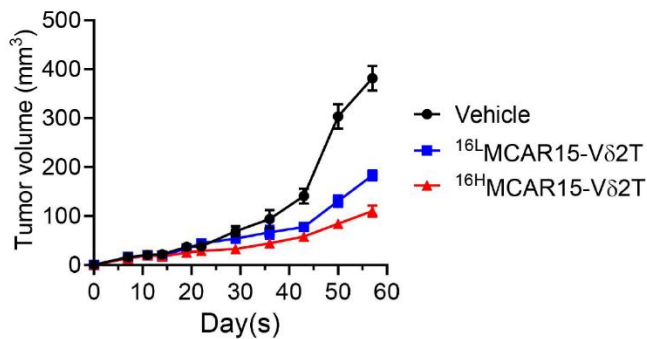**c**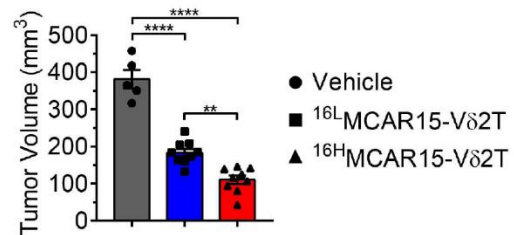

**Supplementary Fig. 5 Comparing the *in vivo* antitumor efficacy of CD16<sup>Hi</sup> and CD16<sup>Lo</sup> MCAR15-Vδ2T cells.** Vδ2 T cells were cultured from the CD16<sup>Hi</sup> or CD16<sup>Lo</sup> donor PBMCs and were engineered to express MCAR and IL-15. The resulting cell products are denoted as <sup>16</sup>H MCAR15-Vδ2T or <sup>16</sup>L MCAR15-Vδ2T cells, respectively. **a** Experimental design. Three experimental groups were included: Vehicle (mice receiving no effector cells; n = 5), <sup>16</sup>L MCAR15-Vδ2T (mice receiving <sup>16</sup>L MCAR15-Vδ2T cells; n = 9 from 3 different donors), and <sup>16</sup>H MCAR15-Vδ2T (mice receiving <sup>16</sup>H MCAR15-Vδ2T cells; n = 9 from 3 different donors). **b** Tumor growth over time. **c** Tumor sizes measured on day 57. Representative of 2 experiments. Data are presented as the mean ± SEM. \*\*p < 0.01; \*\*\*\*p < 0.0001 by one-way ANOVA (c). Source data and exact p values are provided as a Source Data file.
